# Supplementary material for: Al2O3/Ag nanostructured substrates prepared by ALD/CVD for matrix-free laser desorption/ionization mass spectrometry
Source: Royal Society of Chemistry journal article supplement (doi:10.1039/d5ra09570k), 2026-05-20
Supplement: d5ra09570k11.pdf [file d5ra09570k11.pdf]

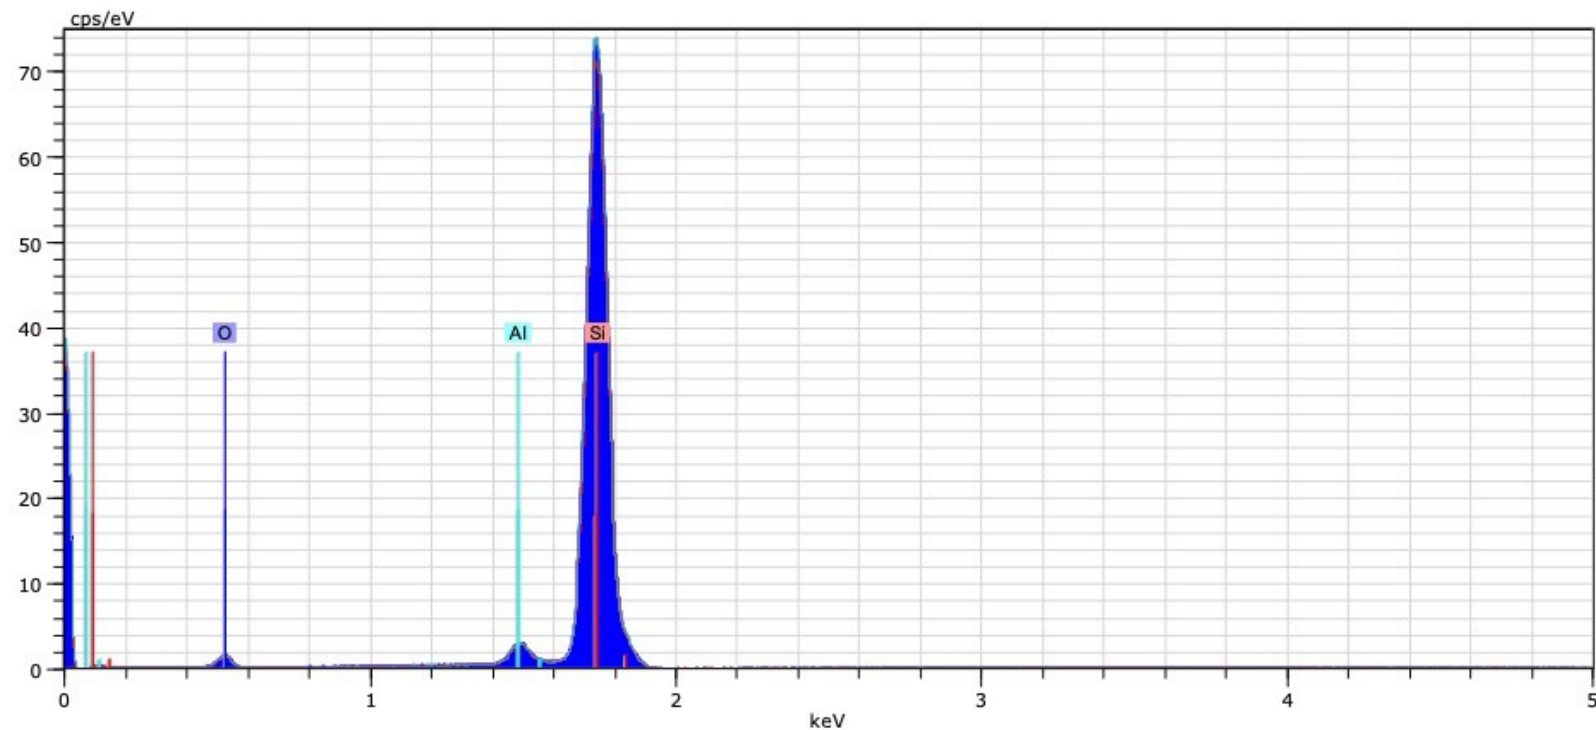

Atomic percent (%)

| Spectrum    | O     | Al   | Si    |
|-------------|-------|------|-------|
| 65201       | 26.71 | 2.35 | 70.94 |
| 65202       | 25.92 | 2.46 | 71.63 |
| 65203       | 26.25 | 2.39 | 71.36 |
| Mean value: | 26.29 | 2.40 | 71.31 |
| Sigma:      | 0.40  | 0.05 | 0.35  |
| Sigma mean: | 0.23  | 0.03 | 0.20  |
