# Supplementary material for: Al2O3/Ag nanostructured substrates prepared by ALD/CVD for matrix-free laser desorption/ionization mass spectrometry
Source: Royal Society of Chemistry journal article supplement (doi:10.1039/d5ra09570k), 2026-05-20

$\text{Al}_2\text{O}_3$

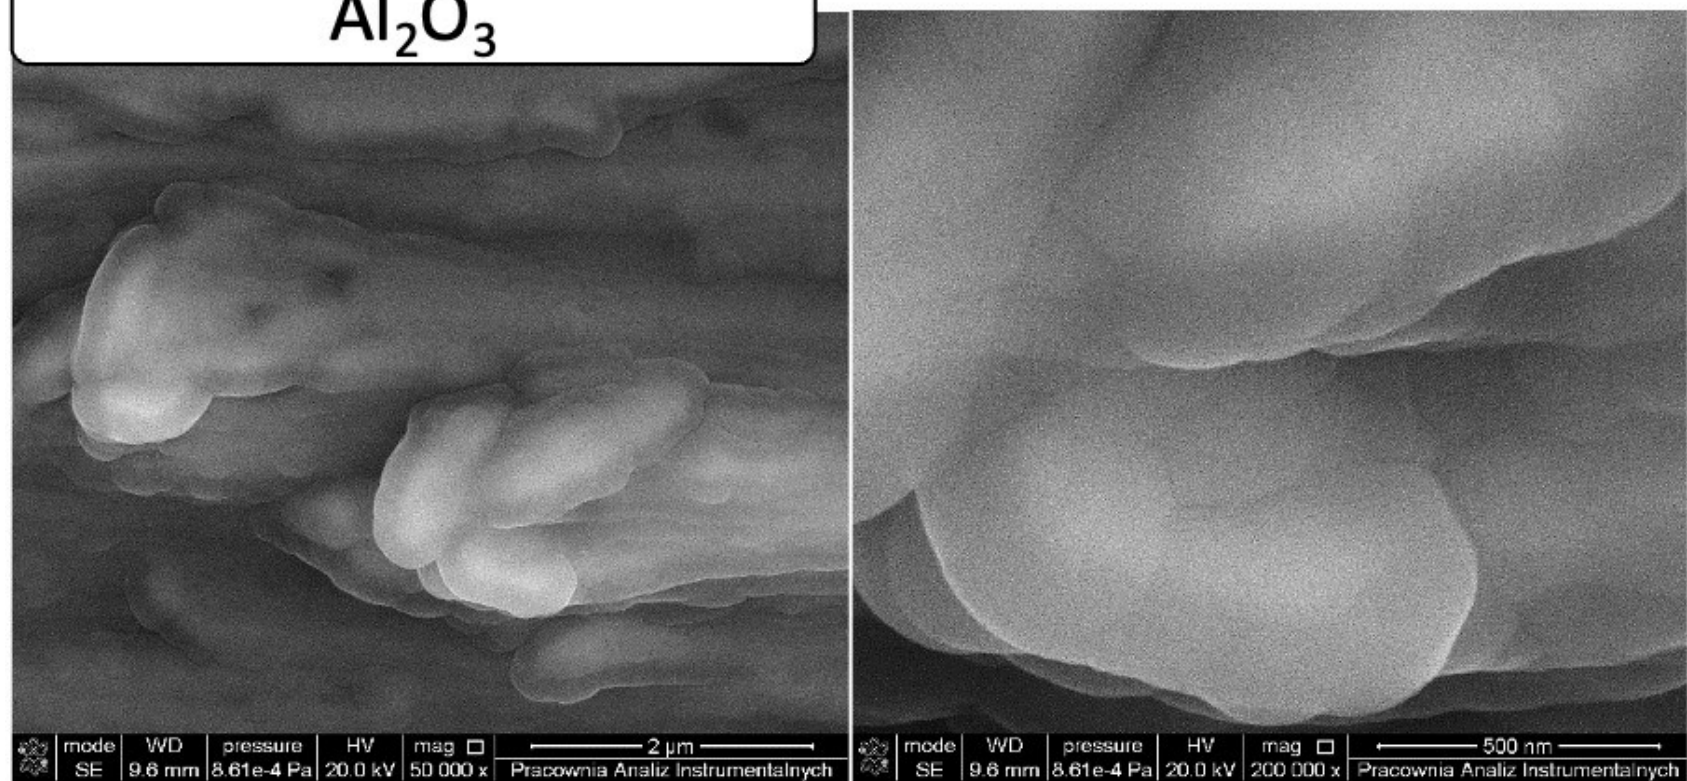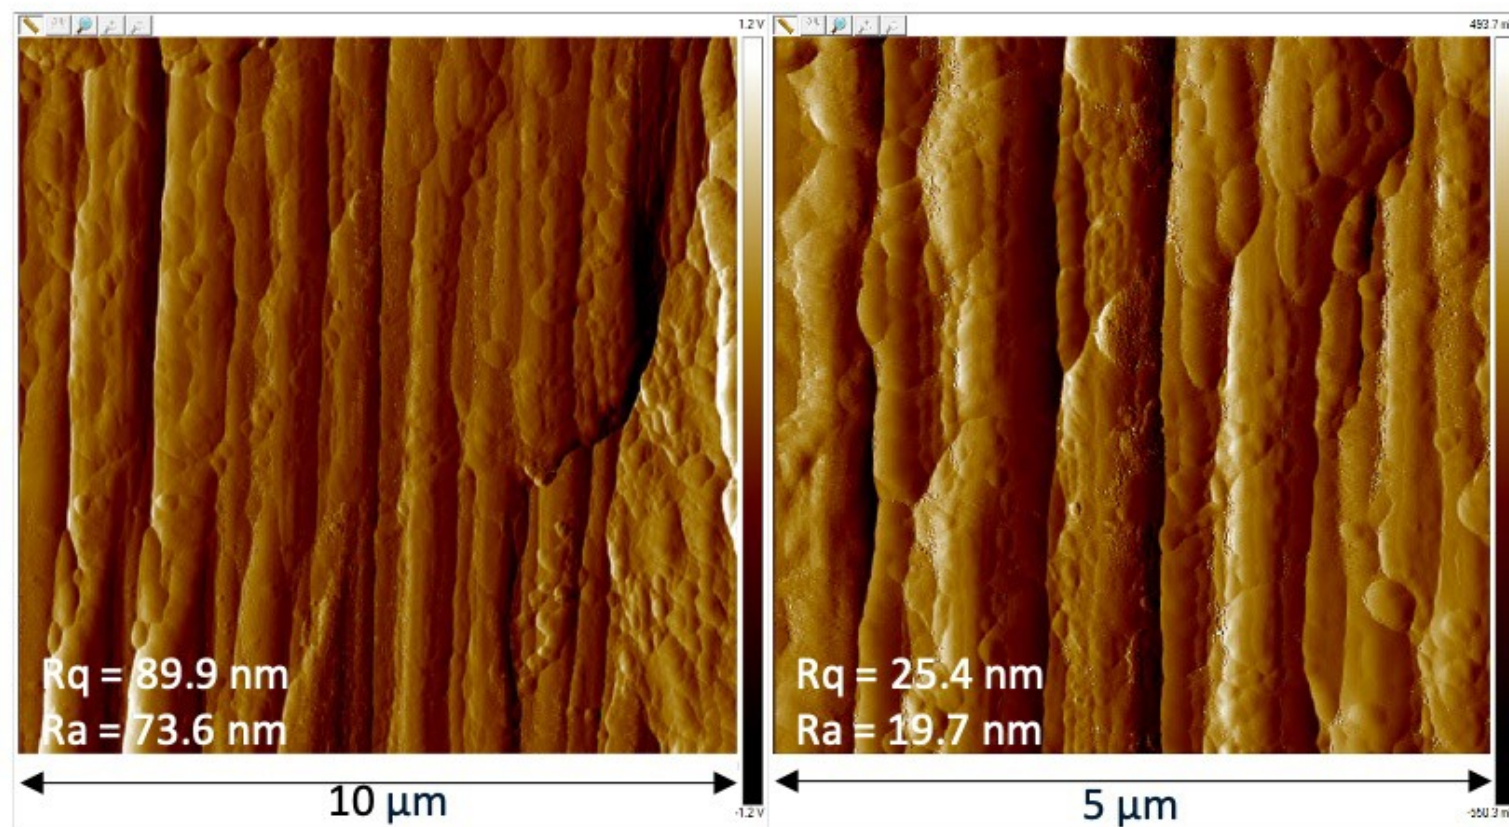

$\text{Al}_2\text{O}_3 + \text{AgNPs}$

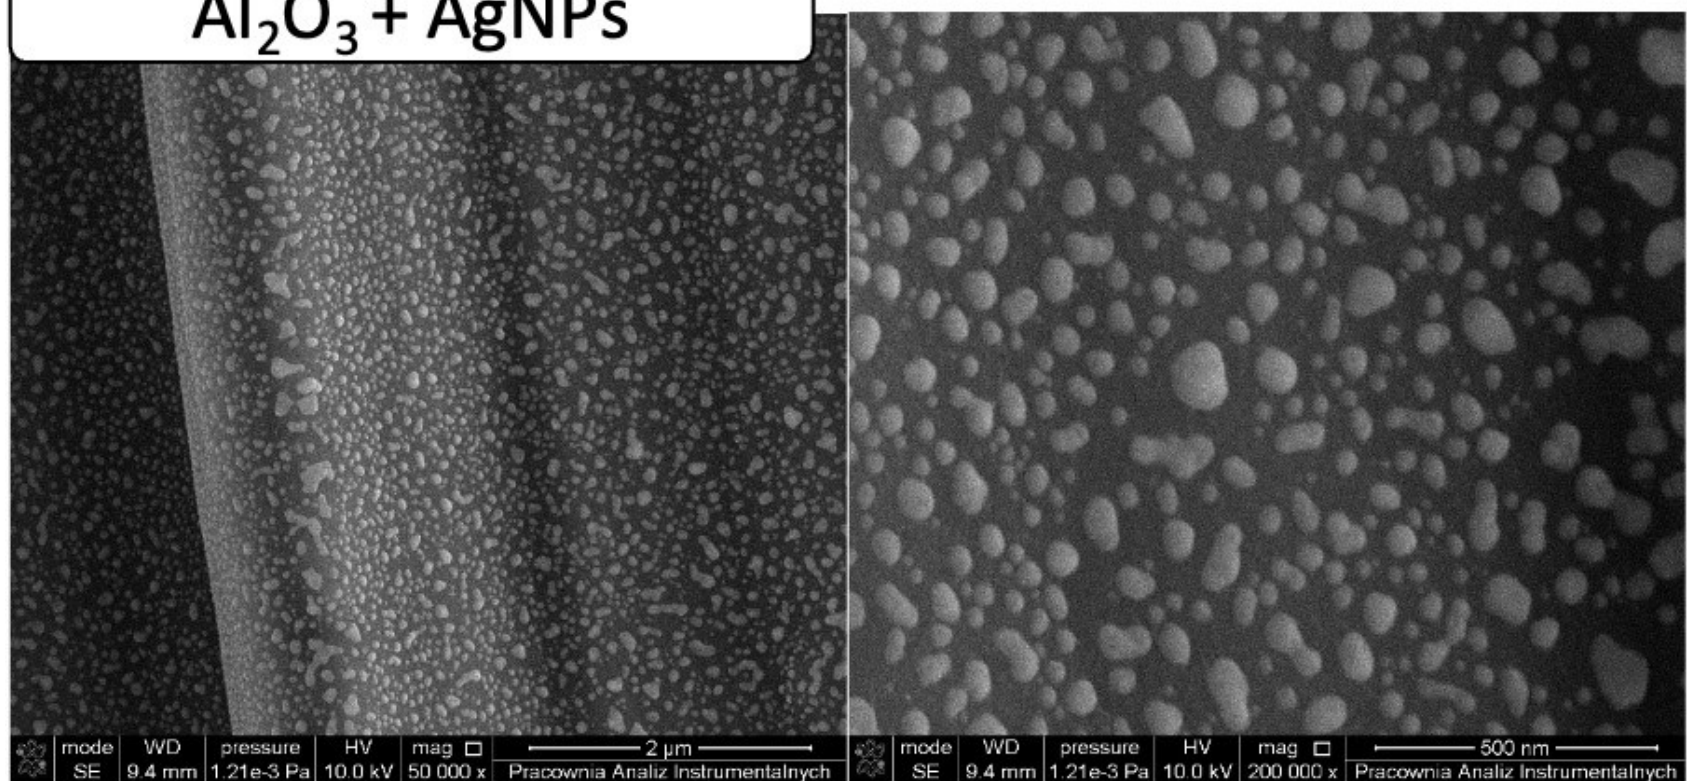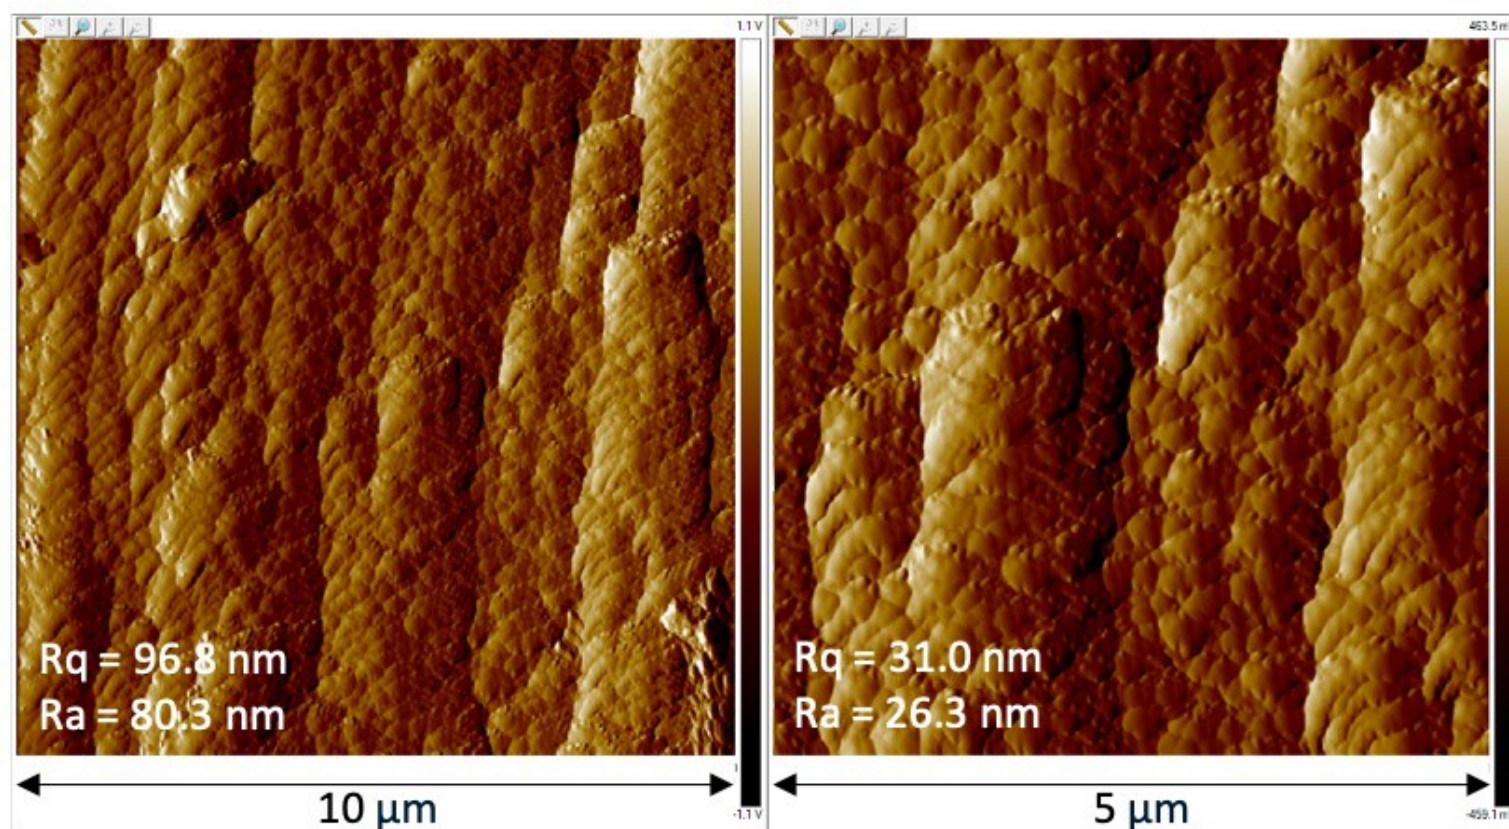

Supplement: d5ra09570k13.pdf [file d5ra09570k13.pdf]
