# Supplementary material for: Al2O3/Ag nanostructured substrates prepared by ALD/CVD for matrix-free laser desorption/ionization mass spectrometry
Source: Royal Society of Chemistry journal article supplement (doi:10.1039/d5ra09570k), 2026-05-20
Supplement: d5ra09570k15.pdf [file d5ra09570k15.pdf]

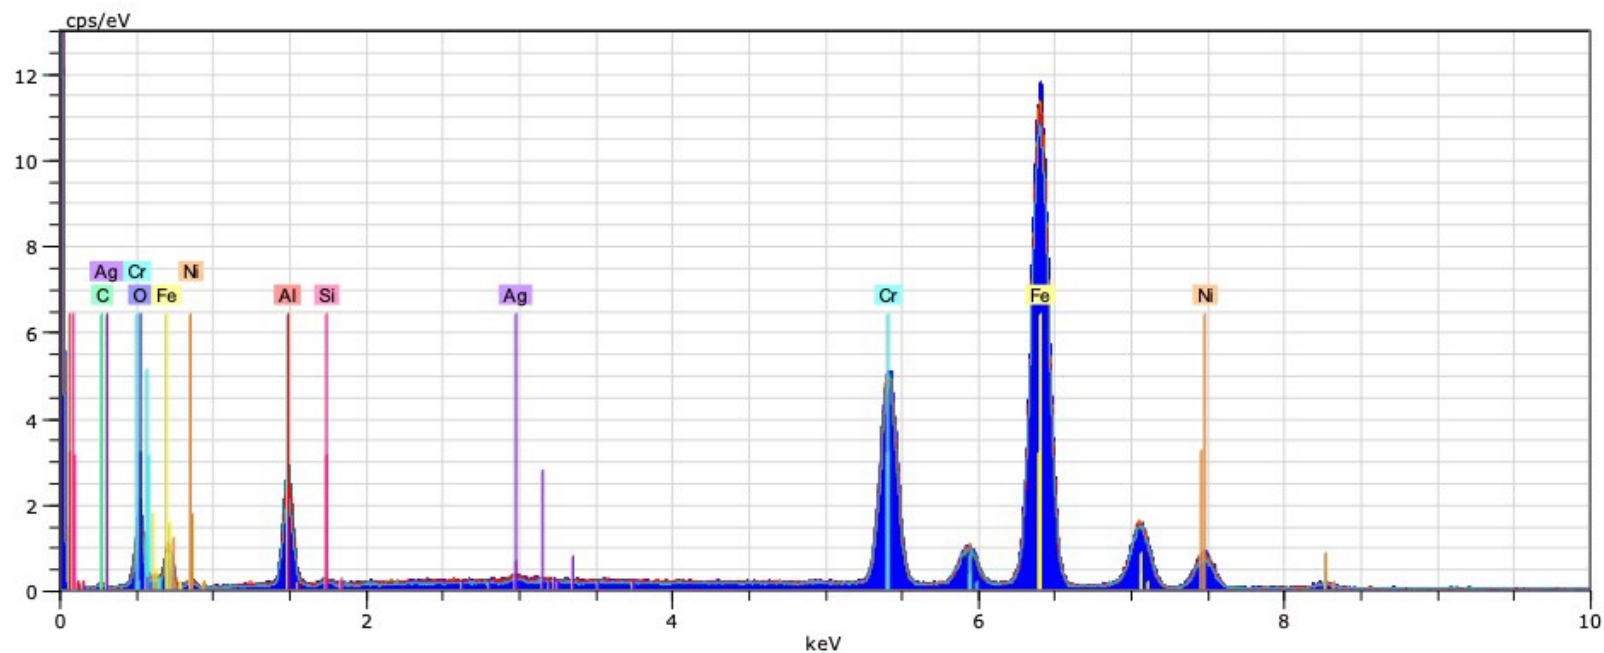

Atomic percent (%)

| Spectrum    | C    | O     | Al    | Si   | Cr    | Fe    | Ni   | Ag   |
|-------------|------|-------|-------|------|-------|-------|------|------|
| 58719       | 2.80 | 11.48 | 14.28 | 0.38 | 14.19 | 51.34 | 5.21 | 0.32 |
| 58720       | 3.06 | 13.22 | 14.88 | 0.40 | 13.81 | 49.34 | 4.96 | 0.34 |
| 58721       | 2.87 | 14.05 | 14.62 | 0.42 | 13.24 | 48.98 | 5.54 | 0.27 |
| 58722       | 2.96 | 12.45 | 12.83 | 0.33 | 14.25 | 51.29 | 5.61 | 0.28 |
| 58723       | 3.28 | 13.96 | 14.26 | 0.48 | 13.63 | 48.89 | 5.22 | 0.29 |
| Mean value: | 2.99 | 13.03 | 14.18 | 0.40 | 13.82 | 49.97 | 5.31 | 0.30 |
| Sigma:      | 0.19 | 1.08  | 0.79  | 0.05 | 0.42  | 1.24  | 0.27 | 0.03 |
| Sigma mean: | 0.08 | 0.48  | 0.35  | 0.02 | 0.19  | 0.55  | 0.12 | 0.01 |
