# Supplementary material for: Al2O3/Ag nanostructured substrates prepared by ALD/CVD for matrix-free laser desorption/ionization mass spectrometry
Source: Royal Society of Chemistry journal article supplement (doi:10.1039/d5ra09570k), 2026-05-20
Supplement: d5ra09570k16.pdf [file d5ra09570k16.pdf]

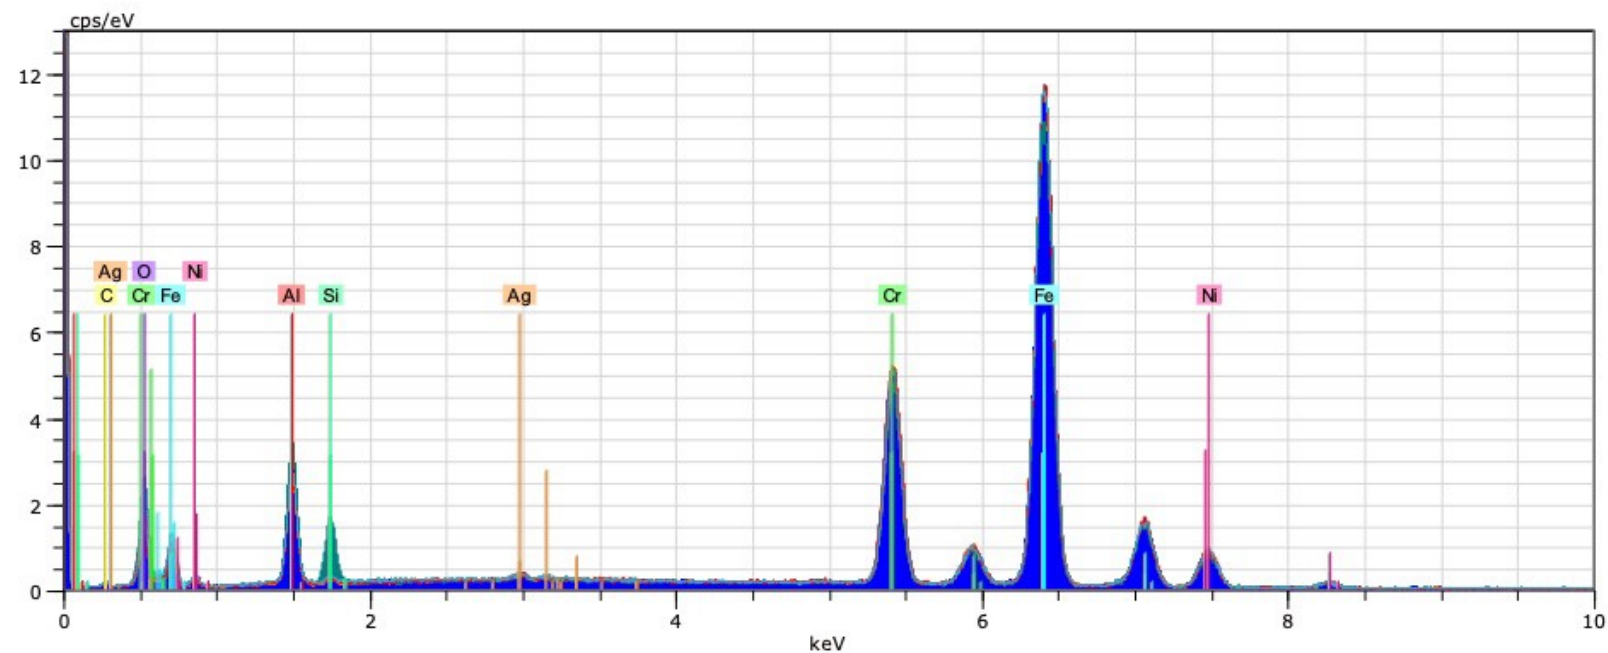

Atomic percent (%)

| Spectrum    | C    | O     | Al    | Si   | Cr    | Fe    | Ni   | Ag   |
|-------------|------|-------|-------|------|-------|-------|------|------|
| 58714       | 3.21 | 14.31 | 12.18 | 0.43 | 13.83 | 50.14 | 5.61 | 0.30 |
| 58715       | 3.40 | 14.40 | 14.08 | 0.47 | 13.82 | 48.37 | 5.13 | 0.33 |
| 58716       | 3.21 | 19.59 | 15.28 | 6.37 | 11.36 | 39.79 | 4.10 | 0.30 |
| 58717       | 3.23 | 13.14 | 14.95 | 0.46 | 13.96 | 48.90 | 5.05 | 0.31 |
| 58718       | 3.15 | 14.53 | 13.76 | 0.43 | 13.62 | 48.93 | 5.26 | 0.31 |
| Mean value: | 3.24 | 15.19 | 14.05 | 1.63 | 13.32 | 47.23 | 5.03 | 0.31 |
| Sigma:      | 0.09 | 2.52  | 1.22  | 2.65 | 1.10  | 4.21  | 0.56 | 0.01 |
| Sigma mean: | 0.04 | 1.13  | 0.54  | 1.18 | 0.49  | 1.88  | 0.25 | 0.00 |
