# Supplementary material for: Al2O3/Ag nanostructured substrates prepared by ALD/CVD for matrix-free laser desorption/ionization mass spectrometry
Source: Royal Society of Chemistry journal article supplement (doi:10.1039/d5ra09570k), 2026-05-20

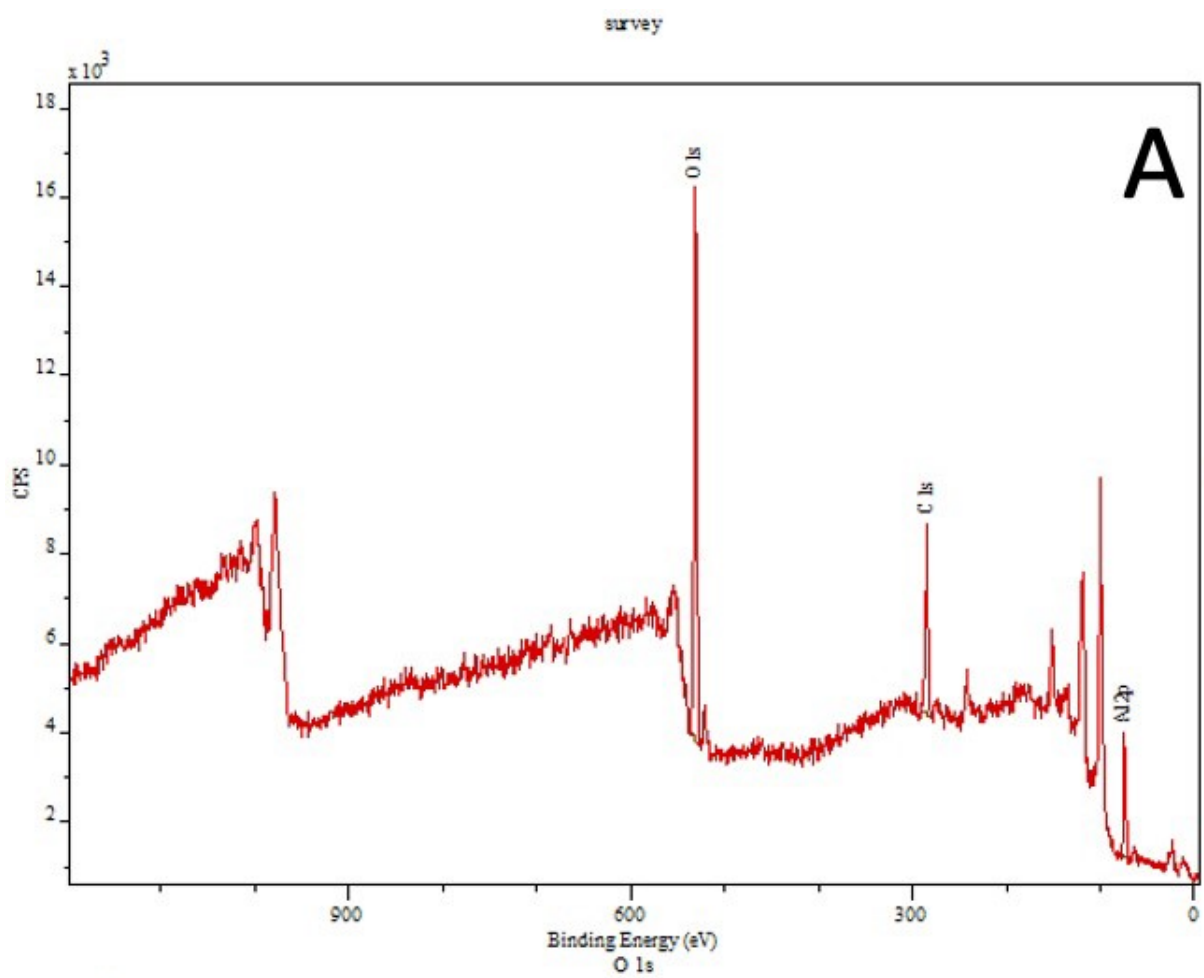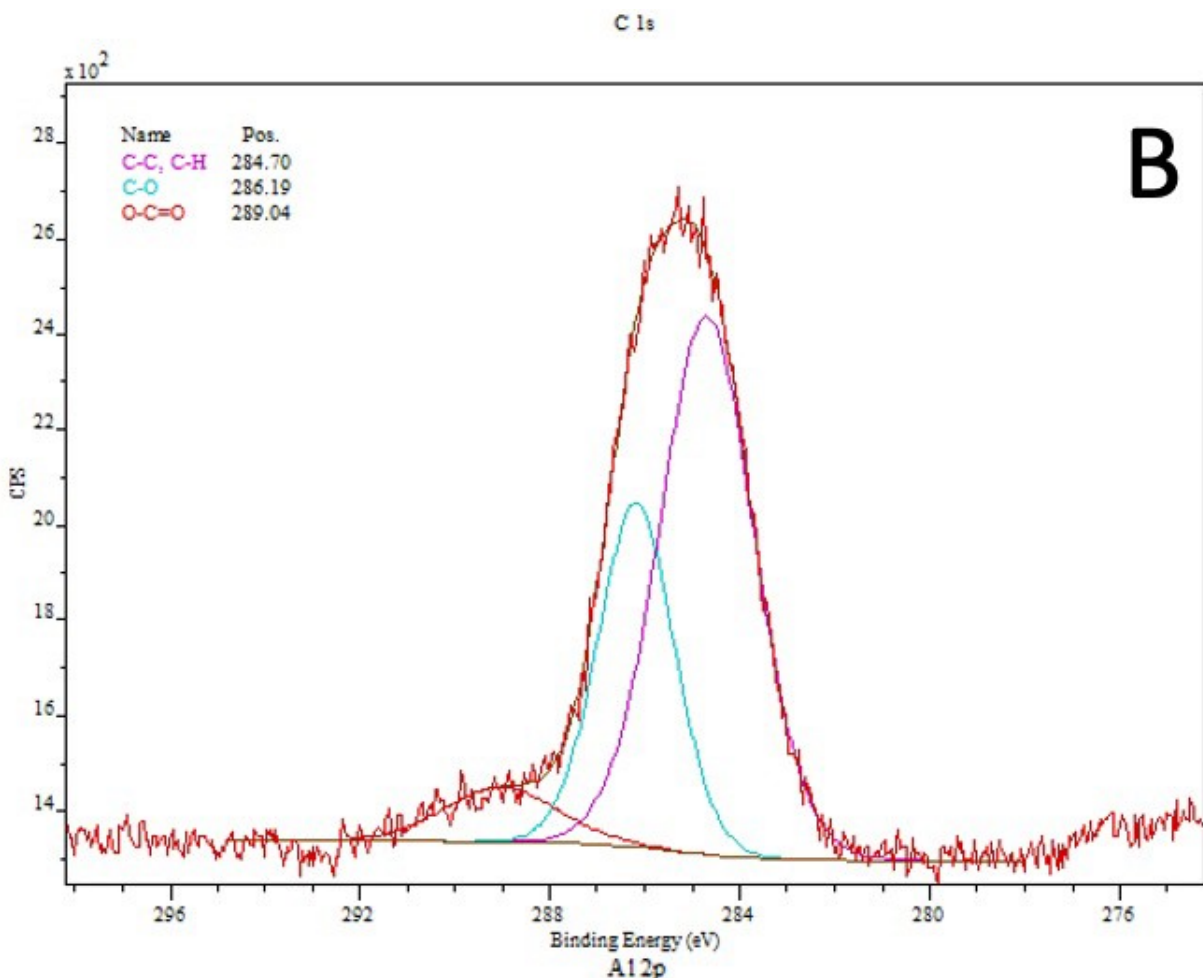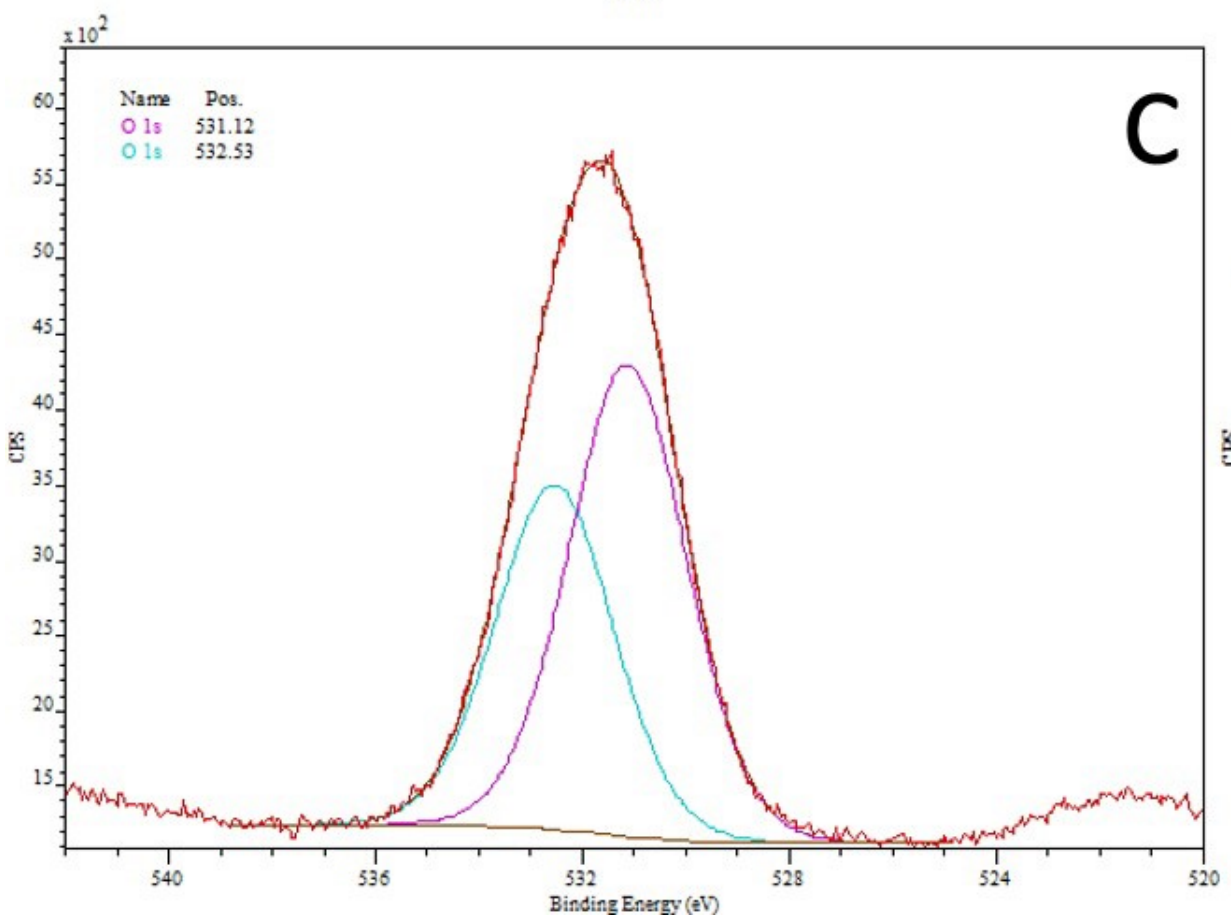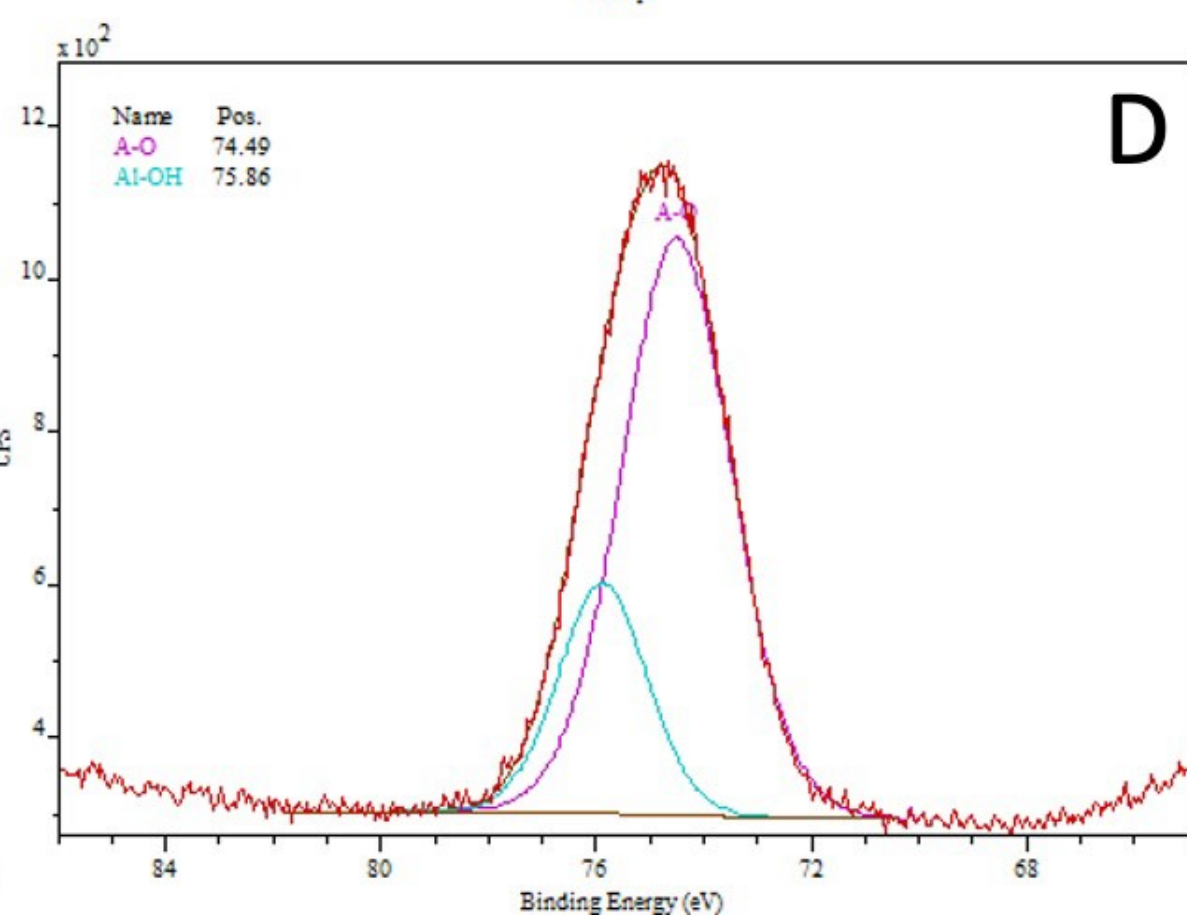

Supplement: d5ra09570k18.pdf [file d5ra09570k18.pdf]
